# Supplementary material for: Polysaccharide of Atractylodes macrocephala Koidz (PAMK) Relieves Immunosuppression in Cyclophosphamide-Treated Geese by Maintaining a Humoral and Cellular Immune Balance
Source: MDPI journal article supplement (doi:10.3390/molecules23040932), 2018-04-17
Supplement: s1 [file s1]

## Appendix

|               | SI     | PN     | PE     | PB     | PM     | PMLL   | PTL    | PAL    | SHL    | SlgM   | SlgA   | SlgG   | BCPR   | TCPR   | STNF $\alpha$ | STGF $\beta$ | SIL6   | SIL4   | SIL10  | SIFN $\gamma$ | SIL1 $\beta$ | RTGF $\beta$ | RIL6   | RIL4  | RIL10 | RIFN $\gamma$ | RIL1 $\beta$ |
|---------------|--------|--------|--------|--------|--------|--------|--------|--------|--------|--------|--------|--------|--------|--------|---------------|--------------|--------|--------|--------|---------------|--------------|--------------|--------|-------|-------|---------------|--------------|
| SI            | 1.000  |        |        |        |        |        |        |        |        |        |        |        |        |        |               |              |        |        |        |               |              |              |        |       |       |               |              |
| PN            | 0.564  | 1.000  |        |        |        |        |        |        |        |        |        |        |        |        |               |              |        |        |        |               |              |              |        |       |       |               |              |
| PE            | 0.366  | 0.228  | 1.000  |        |        |        |        |        |        |        |        |        |        |        |               |              |        |        |        |               |              |              |        |       |       |               |              |
| PB            | 0.493  | 0.304  | 0.350  | 1.000  |        |        |        |        |        |        |        |        |        |        |               |              |        |        |        |               |              |              |        |       |       |               |              |
| PM            | -0.307 | -0.503 | 0.319  | -0.170 | 1.000  |        |        |        |        |        |        |        |        |        |               |              |        |        |        |               |              |              |        |       |       |               |              |
| PMLL          | -0.581 | -0.501 | -0.675 | -0.380 | 0.240  | 1.000  |        |        |        |        |        |        |        |        |               |              |        |        |        |               |              |              |        |       |       |               |              |
| PTL           | -0.405 | -0.869 | -0.289 | -0.299 | 0.212  | 0.425  | 1.000  |        |        |        |        |        |        |        |               |              |        |        |        |               |              |              |        |       |       |               |              |
| PAL           | -0.569 | -0.539 | -0.609 | -0.238 | 0.019  | 0.556  | 0.257  | 1.000  |        |        |        |        |        |        |               |              |        |        |        |               |              |              |        |       |       |               |              |
| SHL           | 0.546  | 0.239  | 0.343  | 0.075  | 0.078  | -0.118 | -0.045 | -0.615 | 1.000  |        |        |        |        |        |               |              |        |        |        |               |              |              |        |       |       |               |              |
| SlgM          | 0.702  | 0.519  | 0.336  | 0.280  | -0.395 | -0.525 | -0.158 | -0.794 | 0.531  | 1.000  |        |        |        |        |               |              |        |        |        |               |              |              |        |       |       |               |              |
| SlgA          | 0.260  | 0.181  | -0.106 | -0.162 | 0.067  | 0.169  | 0.025  | -0.388 | 0.588  | 0.338  | 1.000  |        |        |        |               |              |        |        |        |               |              |              |        |       |       |               |              |
| SlgG          | 0.615  | 0.413  | 0.553  | 0.177  | -0.101 | -0.490 | -0.312 | -0.534 | 0.609  | 0.468  | 0.319  | 1.000  |        |        |               |              |        |        |        |               |              |              |        |       |       |               |              |
| BCPR          | 0.368  | 0.394  | -0.221 | 0.252  | -0.310 | -0.075 | -0.116 | -0.343 | 0.332  | 0.380  | 0.599  | 0.148  | 1.000  |        |               |              |        |        |        |               |              |              |        |       |       |               |              |
| TCPR          | 0.274  | 0.069  | -0.122 | -0.015 | -0.022 | -0.045 | 0.224  | -0.447 | 0.506  | 0.407  | 0.778  | 0.214  | 0.744  | 1.000  |               |              |        |        |        |               |              |              |        |       |       |               |              |
| STNF $\alpha$ | 0.611  | 0.388  | 0.387  | 0.327  | -0.202 | -0.577 | -0.184 | -0.662 | 0.295  | 0.799  | 0.156  | 0.457  | 0.209  | 0.290  | 1.000         |              |        |        |        |               |              |              |        |       |       |               |              |
| STGF $\beta$  | -0.595 | -0.656 | -0.055 | -0.199 | 0.347  | 0.291  | 0.391  | 0.628  | -0.652 | -0.607 | -0.688 | -0.451 | -0.732 | -0.687 | -0.416        | 1.000        |        |        |        |               |              |              |        |       |       |               |              |
| SIL6          | 0.442  | 0.559  | -0.236 | 0.289  | -0.505 | -0.076 | -0.343 | -0.260 | 0.363  | 0.483  | 0.348  | 0.265  | 0.521  | 0.376  | 0.298         | -0.635       | 1.000  |        |        |               |              |              |        |       |       |               |              |
| SIL4          | 0.522  | 0.744  | 0.086  | 0.039  | -0.410 | -0.438 | -0.562 | -0.447 | 0.360  | 0.531  | 0.172  | 0.339  | 0.409  | 0.265  | 0.278         | -0.559       | 0.563  | 1.000  |        |               |              |              |        |       |       |               |              |
| SIL10         | 0.575  | 0.737  | 0.359  | 0.204  | -0.243 | -0.510 | -0.522 | -0.737 | 0.554  | 0.629  | 0.545  | 0.482  | 0.601  | 0.506  | 0.430         | -0.819       | 0.387  | 0.620  | 1.000  |               |              |              |        |       |       |               |              |
| SIFN $\gamma$ | -0.716 | -0.836 | -0.270 | -0.363 | 0.285  | 0.438  | 0.635  | 0.717  | -0.558 | -0.663 | -0.465 | -0.487 | -0.510 | -0.391 | -0.465        | 0.786        | -0.655 | -0.718 | -0.813 | 1.000         |              |              |        |       |       |               |              |
| SIL1 $\beta$  | -0.707 | -0.646 | -0.716 | -0.334 | 0.063  | 0.648  | 0.473  | 0.875  | -0.646 | -0.775 | -0.349 | -0.670 | -0.298 | -0.286 | -0.665        | 0.598        | -0.315 | -0.496 | -0.791 | 0.761         | 1.000        |              |        |       |       |               |              |
| RTGF $\beta$  | -0.430 | -0.436 | 0.046  | 0.012  | 0.217  | 0.301  | 0.122  | 0.622  | -0.454 | -0.549 | -0.624 | -0.312 | -0.720 | -0.844 | -0.478        | 0.797        | -0.510 | -0.537 | -0.674 | 0.668         | 0.462        | 1.000        |        |       |       |               |              |
| RIL6          | 0.551  | 0.587  | -0.079 | 0.336  | -0.271 | -0.145 | -0.335 | -0.526 | 0.536  | 0.557  | 0.691  | 0.293  | 0.776  | 0.733  | 0.413         | -0.859       | 0.749  | 0.553  | 0.664  | -0.802        | -0.510       | -0.787       | 1.000  |       |       |               |              |
| RIL4          | -0.500 | -0.295 | 0.032  | -0.164 | 0.061  | 0.171  | 0.099  | 0.434  | -0.543 | -0.405 | -0.736 | -0.339 | -0.725 | -0.886 | -0.330        | 0.751        | -0.516 | -0.407 | -0.649 | 0.621         | 0.433        | 0.841        | -0.834 | 1.000 |       |               |              |
| RIL10         | -0.713 | -0.640 | -0.540 | -0.236 | 0.137  | 0.571  | 0.362  | 0.953  | -0.707 | -0.809 | -0.426 | -0.648 | -0.405 | -0.439 | -0.672        | 0.739        | -0.361 | -0.555 | -0.795 | 0.809         | 0.892        | 0.671        | -0.599 | 0.499 | 1.000 |               |              |
| RIFN $\gamma$ | -0.746 | -0.750 | -0.561 | -0.363 | 0.249  | 0.769  | 0.615  | 0.712  | -0.480 | -0.613 | -0.334 | -0.642 | -0.347 | -0.316 | -0.588        | 0.689        | -0.293 | -0.599 | -0.824 | 0.789         | 0.812        | 0.546        | -0.570 | 0.509 | 0.799 | 1.000         |              |
| RIL1 $\beta$  | -0.315 | 0.204  | -0.551 | -0.156 | -0.586 | 0.200  | -0.202 | 0.484  | -0.629 | -0.273 | -0.455 | -0.429 | -0.103 | -0.437 | -0.348        | 0.237        | 0.090  | 0.200  | -0.274 | 0.178         | 0.519        | 0.241        | -0.219 | 0.432 | 0.432 | 0.300         | 1.000        |
